# Supplementary material for: One Health evaluation of brucellosis control in Kazakhstan
Source: PLoS One. 2022 Nov 2;17(11):e0277118. doi: 10.1371/journal.pone.0277118 (PMC9629608; doi:10.1371/journal.pone.0277118)
Supplement: S1 Table — Excel file with the interview scores. (XLSX) [file pone.0277118.s007.xlsx]

## Sheet: Interview data
This is a supporting data for the manuscript titled: "One Health Evaluation of brucellosis control in Kazakhstan"
Authors: Charypkhan Duriya, Rüegg Simon
email: charypkhan1@gmail.com
These are the scores provided by the interviewees for the NEOH tool
	q3.1	q3.2	q3.3	q3.4	q3.5	q3.6	q3.7	q3.8	q3.9	q3.10	q4.1	q4.2	q4.3	q4.5	q4.6	q4.7	q4.8	q5.1	q5.2	q5.3	q5.4	q5.5	q5.6	q5.7	q5.8	q6.2	q6.3	q6.4	q6.5	q6.6	q6.7	q6.8	q7.1	q7.2	q7.3	q7.4	q7.5	q7.6	q7.7	q7.8	q7.9	q7.10	q7.11	q8.1	q8.2	q8.3	q8.4	q8.5	q8.6
	0.66	0.66	1	1	0.66	0.5	0.66	0.66	0.33	1	1	1	1	1	1	1	1	1	0.66	1	1	1	0.66	0.11	0.66	1	0.33	1	0	1	1	1	0.66	1	0.66	0	1	1	1	1	1	1	1	0.33	0.66	0.33	0.66	0.66	0.33
	1	0	0.66	0.33	0.66	1	0.66	0	1	1	0.33	1	0.66	0.66	0.66	0.33	0.33	1	0.66	0.66	1	1	1	0.55	1	0.66	0.33	0.66	1	1	0	NA	0.66	1	0.33	0.33	0.66	0.66	1	1	1	0.66	0.66	0	0.66	0.33	1	0.66	0
	1	0.33	0.33	0.33	0.66	0	0.66	0.33	0.66	1	0.66	1	0.66	0.66	0.66	0.33	0.33	1	1	1	1	0.33	0.33	0.11	0.33	1	0.33	0.66	0.33	0.33	1	0.66	1	1	0.66	0.33	0.66	0.66	1	0.66	1	0.66	0.66	0	0.66	0.33	0.66	0.33	0.33
	1	0.33	0.66	0.66	1	0.5	0.66	0	0.66	0.33	1	1	0.66	0.66	1	0.66	0.66	1	1	1	1	1	0.66	0.33	0.33	0.66	0.33	1	0.33	1	0	0.66	0.66	1	1	0.33	0.66	0.33	0.66	0.66	1	1	0.66	0.66	0.33	0	1	0.66	0.33
	1	0.33	0.33	0.33	0.66	1	0.33	0.66	0.66	1	0.66	0.33	0.33	0.66	0.66	0.33	0.66	1	0.66	1	1	0.66	0.66	0.22	0.66	0.66	0.33	1	0.33	1	0	0	0.66	1	0.66	0.66	0.66	0.66	0.66	0.66	1	1	0.66	0.66	0.33	0.33	0.66	0.66	0
	1	0.66	1	1	1	0	0.66	0.66	0.66	1	1	1	1	1	1	0.66	1	1	0.66	1	1	1	0.66	0.11	0.66	1	0.33	1	0	1	1	1	0.66	1	0.66	0	0.66	1	1	1	1	1	1	0.33	0.66	0.33	0.66	0.66	0.66
	0.66	1	1	0.66	1	0	1	0.33	0.66	1	0.66	1	1	0.66	0.66	0.33	0.66	0.66	0	1	1	0.66	0.66	0.22	1	0.66	1	0.33	0.33	0	1	0	0.66	1	0.66	0.66	1	0.66	0.66	1	1	1	0.66	0	0.66	1	0.66	0.66	1
	1	NA	NA	0	1	0	0.66	NA	1	0	0.66	0.66	1	1	0.66	0.66	0.66	1	0.66	1	1	0.66	0.33	0.88	0.66	1	0.33	0.66	0.66	1	0	1	1	1	1	0.33	0.66	0.66	0.66	0.66	1	0.66	0.66	0.33	0.33	0.33	0.66	0.66	0.33
	0.66	0	0.66	0.66	0.66	0.5	0	0	0.66	1	0.66	1	0.33	0.66	1	1	1	1	0.66	1	1	0.66	0.66	0.33	0.33	1	0.33	0.66	0.33	0.33	0.66	0.66	1	1	1	0.33	0.66	0.66	1	0.66	1	1	1	0.66	0.66	0.33	1	0.66	0.33
	0.33	0	0	0.66	1	1	0.66	NA	1	0.33	0.66	1	1	0.66	1	0.33	0.66	1	0.66	1	1	0.33	0.66	NA	NA	0.66	0.33	0.66	0	0.33	1	0	0.33	1	1	0.33	1	0.66	0.66	0.66	1	1	0.66	1	0.66	0.33	1	0.66	0.33
	1	0	NA	NA	0.66	0	0.33	0.33	0.33	0	0.33	1	0	0.33	0.33	0.33	0	1	0.33	1	1	0.33	0	0.11	0.33	0.33	0	0	0	1	0	0.33	0.33	1	0.33	0.33	0	0	1	1	1	0.33	0.33	0.33	0.33	0.33	0.66	0.33	0.33
	1	0.33	1	0.33	0.66	0	0.33	0.66	0.66	1	0.66	1	0.33	0.66	0.66	0.66	0.66	1	1	1	1	1	1	0.22	0.33	0.66	0.33	0.66	1	1	1	0.66	0.66	1	1	0.33	0.33	0.66	1	1	1	1	0.66	0.66	0.33	0.33	1	0.66	0.33
	1	0.33	1	1	0.66	0	0.33	0.66	0.66	1	0.33	1	1	1	1	1	1	1	0.66	1	1	1	0.66	0.11	0.66	1	0.33	1	0	0.33	1	1	0.66	1	0.66	0.33	1	1	1	1	1	1	1	0.33	0.66	0.33	0.66	0.66	0.33
	0.33	0	0.33	0.66	0.66	0.5	0.33	0.33	0	0.33	0.66	1	0	0.66	1	0.66	0.66	1	1	1	1	1	1	0.22	0.33	1	0.33	0.33	0.33	0.66	0.66	0.66	0.33	1	0.66	0.33	0.66	0.66	1	0.66	1	1	0.66	0.66	0.66	0.33	1	0.66	0.33
	0.66	0.33	0	0.33	1	0	0	0.33	0.33	1	0.66	1	1	1	0.66	0.33	0	1	0.66	0.33	1	1	0.66	0.11	0.33	0.66	0.33	0	0	0.66	0	0	0.66	1	1	0.66	0.66	0.33	1	0.66	1	1	0.66	0.33	0.33	0.33	1	0.33	0.33
	0.33	0.33	0.66	0	0.66	1	0.66	0.66	0.66	1	1	1	0.33	0.66	0.66	0.66	0.66	1	0.66	1	1	0.66	1	0.66	0.33	0.66	0.66	0.33	0	0.33	1	1	0.66	1	0.66	0.66	0.66	0.66	1	0.66	1	1	0.66	0.66	0.66	0.33	1	0.66	0.33
	0.33	0.33	0.33	0.33	0.66	1	0.33	0.33	0	1	0	0.66	0.66	0.66	0.33	0.33	0.33	0.66	0.66	1	1	0.66	0.33	0.11	0.33	0.66	0.33	0.66	1	0.66	0	0.66	0.66	1	0.66	0.33	0.66	0.66	0.66	0.66	0.66	0.66	0.66	0.33	1	0.33	0.33	0.33	0
	0.66	0.66	0.33	1	0.66	0.5	0.33	0.33	0.33	0.33	0.33	1	0.33	0.66	0.66	0.33	0.33	1	0.66	1	1	1	1	0.88	0.66	0.66	0.33	0.33	0.33	0.66	0.33	0.66	0.66	1	1	0.33	0.66	0.33	1	1	1	0.66	0.66	0.66	0.33	0.33	1	0.33	0
	1	0.66	0.33	0.66	0.66	0	0.33	0.33	1	1	0.66	0.66	0.33	0.33	0.33	0.33	0.33	1	0.66	1	0.66	1	0.66	0.55	0.33	0.66	0.33	0.33	0	0.66	0	0	0.33	1	1	0.33	0.33	0.33	0.66	0.66	0.66	1	0.66	1	0.33	0.33	0.66	0.33	0.33
These are the medians for the scores used to fill out Evolvinc tool
NEOH question number	3.1	3.2	3.3	3.4	3.5	3.6	3.7	3.8	3.9	q3.10	4.1	4.2	4.3	4.5	4.6	4.7	4.8	5.1	5.2	5.3	5.4	5.5	5.6	5.7	5.8	6.2	6.3	6.4	6.5	6.6	6.7	6.8	7.1	7.2	7.3	7.4	7.5	7.6	7.7	7.8	7.9	q7.10	7.11	8.1	8.2	8.3	8.4	8.5	8.6
EVOLvINC question number	q3.9	q3.10	q3.11	q3.12		q3.13	q3.14	q3.15	q3.3	q3.16	q4.1	q4.3	q4.4	q4.6	q4.7	q4.8	q49	q5.6	q5.7	q5.8	q5.9	q5.3	q5.4	q5.1	q5.2	q6.1	q6.2	q6.3		q6.6	q6.7	q6.8		q7.1					q7.7	q7.8	q7.9	q7.10		q8.1	q8.2	q8.3	q8.4	q8.5	q8.6
median	1	0.33	0.66	0.66	0.66	0.5	0.33	0.33	0.66	1	0.66	1	0.66	0.66	0.66	0.33	0.66	1	0.66	1	1	1	0.66	0.22	0.33	0.66	0.33	0.66	0.33	0.66	0.66	0.66	0.66	1	0.66	0.33	0.66	0.66	1	0.66	1	1	0.66	0.33	0.66	0.33	0.66	0.66	0.33
[truncated: 13 more columns]
